# Supplementary material for: Bidirectional FtsZ filament treadmilling transforms lipid membranes via torsional stress
Source: Research Square preprint supplement (doi:10.21203/rs.3.rs-91093/v1), 2020-11-09
Supplement: Supplementary file 1 [file 5f1a8e001ec2635d43fe7345.xlsx]

## Sheet: Fig 3.  pitch-diam-density
T108A						FtsZ
	diameter	prot_density	mean_pitch				diameter	prot_density	mean_pitch
1	0.4285	0.86	3.31718			1	0.508	0.511	1.42975
2	0.464	0.714	3.57622			2	0.459	0.68	1.8715
3	0.474	0.863	3.69075			3	0.445	0.632	1.57182
4	0.406	0.796	3.6974			4	0.44	0.73	2.527
5	0.458	0.719	2.394			5	0.486	1.05	1.15444
6	0.467	1.28	3.5378			6	0.497	0.95	1.24536
7	0.475	1.09	3.47462			7	0.426	0.814	2.14009
8	0.4056	0.696	3.04792			8	0.509	0.829	2.27309
9	0.417	0.92	3.29175			9	0.555	0.972	1.2065
10	0.44	1.33	3.101			10	0.422	0.684	1.65142
						11	0.441	0.72	2.261
						12	0.54	0.786	1.41867

## Sheet: Fig 3. Pitch-distribution
Pitch_FtsZ	Pitch_T108A
1.729	2.128
1.197	2.793
1.33	5.32
1.596	3.325
1.463	2.66
1.596	4.123
1.463	2.66
1.064	3.99
1.995	4.389
1.197	3.059
1.463	2.394
1.064	3.99
2.527	2.66
1.33	2.793
1.197	3.059
1.463	2.66
1.197	4.389
1.995	2.394
1.862	2.926
1.463	4.921
2.66	4.256
1.33	2.793
2.66	4.256
2.527	2.527
2.66	2.793
1.33	3.724
1.596	4.655
1.33	3.857
1.463	3.458
2.261	2.128
1.596	2.793
1.064	5.054
1.197	4.655
2.128	2.527
1.596	4.655
1.33	4.522
1.729	3.724
1.596	4.123
3.059	3.857
1.995	3.192
1.729	3.724
2.66	4.389
2.394	2.394
2.394	2.793
1.862	4.123
3.192	3.591
2.527	2.394
2.261	3.591
1.995	4.788
2.394	4.788
3.059	4.389
1.995	3.192
1.862	2.926
2.261	3.857
4.921	3.458
2.128	4.389
3.591	3.458
2.66	3.192
2.261	4.655
1.995	3.325
2.926	2.793
2.394	3.857
2.793	3.99
1.862	3.059
2.128	4.256
3.724	2.261
2.793	2.527
3.059	2.394
2.66	1.596
2.527	2.394
1.995	4.522
1.995	2.926
3.325	3.99
1.33	3.857
1.197	4.389
0.931	3.857
1.197	2.66
0.798	2.926
1.064	2.527
0.931	3.724
1.064	4.389
1.463	3.325
1.064	2.66
1.064	3.325
1.862	3.059
1.33	3.059
0.931	2.394
1.064	3.458
1.596	3.724
1.463	2.128
1.064	2.926
1.197	2.128
0.931	3.724
1.064	3.99
1.064	3.458
0.931	5.054
0.931	3.591
1.33	2.128
1.064	2.128
1.33	2.527
0.798	5.054
1.463	2.926
1.33	2.128
1.064	3.192
1.197	3.591
1.33	4.655
0.931	2.793
2.128	4.788
1.729	2.128
1.197	3.059
1.064	3.458
1.197	2.66
1.33	3.059
1.197	3.458
1.064	3.19
0.798	3.32
1.064	2.793
1.729
1.064
1.33
2.66
2.128
1.862
2.128
2.926
1.596
1.862
1.862
2.793
1.862
1.862
2.793
2.926
2.527
1.995
2.394
1.33
1.33
1.995
2.261
3.059
2.394
1.463
0.798
1.33
1.33
1.064
1.596
0.798
1.33
1.33
1.33
0.798
1.197
1.197
1.33
1.064
2.394
1.463
1.463
1.33
2.394
1.463
1.463
1.596
2.261
1.33
1.596
1.995
2.261
2.66
2.128
2.128
2.128
2.261
2.527
2.128
2.128
2.66
2.128
1.463
1.596
1.197
1.596
1.729
1.463
1.33
1.463
0.798
1.862
1.729
1.33
1.33
1.197
1.197

## Sheet: Fig 4. Force_calc
Notes	Lipid	pN	pN/um		FtsZ	pN	pN	pN/um				FtsZ_filtered	pN	pN	pN/um			pN/ring
Signal represent the amplitude	Signal	Force	k-spring		Signal	Force	Force-lipid	k-sprng	PrteinSignal	No.Rings		Signal	Force	Force-lipid	k-sprng	PrteinSignal	No.Rings	Force/ring
of the signal detected by OT	0.0126	0.561687	0.187229		0.044	1.97399	0.323575	0.657997	268474	1.38484		0.044	1.97399	0.323575	0.657997	268474	1.38484	1.42543
	0.0115	0.512651	0.170884		0.054	2.42263	0.77221	0.807542	350867	1.80984		0.054	2.42263	0.77221	0.807542	350867	1.80984	1.33858
	0.0107	0.476988	0.158996		0.0695	3.11801	1.46759	1.03934	776656	4.00615		0.0695	3.11801	1.46759	1.03934	776656	4.00615	0.778306
	0.0251	1.11892	0.372972		0.0737	3.30644	1.65602	1.10215	326757	1.68548		0.0737	3.30644	1.65602	1.10215	326757	1.68548	1.96172
	0.0266	1.18578	0.395261		0.0404	1.81248	0.162067	0.604161	288022	1.48568		0.0404	1.81248	0.162067	0.604161	288022	1.48568	1.21997
	0.0223	0.994096	0.331365		0.0396	1.77659	0.126176	0.592198	387095	1.99671		0.0396	1.77659	0.126176	0.592198	387095	1.99671	0.889758
	0.0201	0.896024	0.298675		0.0828	3.71469	2.06428	1.23823	503777	2.59858		0.0828	3.71469	2.06428	1.23823	503777	2.59858	1.42951
	0.036	1.60706	0.535687		0.0809	3.62945	1.97904	1.20982	654901	3.37811		0.0809	3.62945	1.97904	1.20982	654901	3.37811	1.0744
	0.023	1.03407	0.344688		0.0254	1.13953	-0.510885	0.379844	387536	1.99899		0.0456	2.04577	0.395357	0.681924	635717	3.27916	0.623872
	0.027	1.21273	0.404242		0.0204	0.915214	-0.735202	0.305071	688250	3.55013		0.0502	2.25215	0.601729	0.750715	526507	2.71583	0.829266
	0.037	1.65042	0.550139		0.0207	0.928673	-0.721743	0.309558	509525	2.62823		0.1021	4.58056	2.93014	1.52685	753368	3.88602	1.17873
	Mean	1.02276	0.340922		0.0456	2.04577	0.395357	0.681924	635717	3.27916		0.0536	2.40468	0.754265	0.80156	652148	3.36391	0.714847
					0.0209	0.937646	-0.71277	0.312549	821005	4.23491		0.0574	2.57516	0.924746	0.858387	785352	4.051	0.635685
					0.0284	1.27412	-0.376294	0.424707	835628	4.31034		0.0633	2.83986	1.18944	0.946619	545871	2.81571	1.00857
					0.0371	1.66443	0.0140176	0.554811	654236	3.37468		0.0772	3.46346	1.81304	1.15449	541323	2.79225	1.24038
					0.0321	1.44012	-0.2103	0.480039	201412	1.03892		0.099	4.44148	2.79107	1.48049	660145	3.40516	1.30434
sensitivity of the OT (Volts/um)	sensitivity	1.66			0.0371	1.66443	0.0140176	0.554811	499812	2.57813		0.0738	3.31092	1.66051	1.10364	663521	3.42258	0.967378
Stiffness (pN/um)	stiffness	74.4733			0.0335	1.50293	-0.147491	0.500975	823407	4.2473		0.0458	2.05475	0.40433	0.684915	782114	4.0343	0.509319
					0.0158	0.708843	-0.941574	0.236281	1025035	5.28734		0.0704	3.15839	1.50797	1.0528	550214	2.83811	1.11285
Mean brightness of FtsZ rings	Ring_signal	193866			0.0299	1.34142	-0.308999	0.447139	1082934	5.58599		0.0638	2.86229	1.21187	0.954096	359897	1.85642	1.54183
in flat surface					0.0284	1.27412	-0.376294	0.424707	975716	5.03294		0.0458	2.05475	0.40433	0.684915	714525	3.68566	0.557497
					0.0502	2.25215	0.601729	0.750715	526507	2.71583		0.0602	2.70078	1.05036	0.90026	633036	3.26533	0.827108
					0.1021	4.58056	2.93014	1.52685	753368	3.88602		0.0568	2.54824	0.897828	0.849415	615180	3.17322	0.803046
Since the FtsZ force is less or					0.0536	2.40468	0.754265	0.80156	652148	3.36391				Mean_F_FtsZ	0.946959
equal to the highest lipid contribution					0.0574	2.57516	0.924746	0.858387	785352	4.051				FtsZ-Lipid	0.606037
these data points are removed.					0.0633	2.83986	1.18944	0.946619	545871	2.81571				k_z/k_l	1.77764
FtsZ_filtered					0.0772	3.46346	1.81304	1.15449	541323	2.79225
					0.099	4.44148	2.79107	1.48049	660145	3.40516
					0.0738	3.31092	1.66051	1.10364	663521	3.42258
					0.0458	2.05475	0.40433	0.684915	782114	4.0343
					0.0704	3.15839	1.50797	1.0528	550214	2.83811
					0.0344	1.5433	-0.107114	0.514434	353753	1.82473
					0.0638	2.86229	1.21187	0.954096	359897	1.85642
					0.0458	2.05475	0.40433	0.684915	714525	3.68566
					0.0602	2.70078	1.05036	0.90026	633036	3.26533
					0.0568	2.54824	0.897828	0.849415	615180	3.17322

## Sheet: Fig 4 Ring-Brightness
Brightness ring	(A.U.)
194549
204950
149219
114033
126964
156298
189637
164701
172240
208518
124625
146561
139487
132166
93924
158507
220638
196554
157182
139914
135047
109108
316096
189475
212389
155552
150419
159100
169482
177451
194990
131206
199582
195842
147837
156607
153992
115196
202544
212757
177966
158080
213888
209885
194321
135833
183564
219540
272356
137398
168109
130556
155639
113744
108578
216486
111540
178752
215339
198522
183878
192647
163787
160654
209751
175766
186940
190746
165735
106974
170526
197907
196735
146671
188561
167651
177951
289103
127962
211029
227863
181171
182961
205033
164666
174995
194529
117997
177494
172349
209018
152344
142804
216267
180655
158545
177340
169362
274551
87401
220637
183615
173599
156686
176370
116012
183275
199346
160391
187320
172501
136292
228243
149045
232380
200168
191283
127241
197818
425695
135300
187575
119628
98196
238565
201454
193866
226234
179102
267293
213114
211427
187428
211621
138096
217440
165847
135503
184881
189826
216562
169113
157275
343793
205331
200693
223588
132964
174185
105825
223689
210395
154839
163860
230730
182724
170300
192062
212217
257340
177124
232885
428515
180800
191032
223850
98472
138914
193379
183117
201239
195539
181927
153329
130675
175778
132140
145480
172390
177288
167535
128921
168765
164049
171325
243453
171142
135398
180665
198034
134305
350628
127878
160376
198933
192172
229071
227183
192890
189327
174506
224347
187472
241756
234366
128508
215013
201623
155024
155288
187340
167192
136020
197878
151527
177578
171425
159476
174792
241334
276129
238390
149847
171258
170910
88880
210382
225007
199532
206140
223730
144912
177622
290469
184473
150415
140039
163098
197822
247838
153551
118602
157961
155869
182220
156232
139530
146907
177047
252186
151949
165356
255022
187136
237731
219196
300132
400845
368121
400715
361011
276253
233340
337755
233915
398496
225043
257348
258021
278186
272199
286293
164228
474175
299540
282592
244363
254748
206497
240498
233323
193866
218725
177176
408071
366744
306570
242442
216923
251192
290987
225275
194691
200830
212457
226823
164585
400013
225594
347084
358590
409231
364067
343993
242966
335734
209985
244628
196253
276331
298970
295393
324787
307569
284279
240912
244275
337868
364766
316851
199146
231580
297445
190074
270176
370893
210134
453911
322208
311636
235542
264033
333694
283076
258976
253297
232530
241583
300569
182238
316950
350200
340826
192851
297718
253626
319953
197877
384855
280911
325690
313314
244150
338842
338715
310478
188715
435409
312240
205126
362246
298024
196662
312703
301771
352308
361174
291787
285497
269015
276361
203362
255535
214694
215792
165019
175417
168423
193793
235218
168238
233223
170332
427987
367232
219967
295438
363624
442505
361122
310844
301955
261555
256684
216646
287576
351601
331869
270897
286348
230489
256708
259174
342482
246501
221671
279076
220157
353303
228866
209322
206830
193866

## Sheet: Text. Young-mod-calc
Bend_mod_Lip	Youngs Mod		Pers. Len_FtsZ	3.9e-07			K_{B}	K_{B}*T	Room_Temp	22
8.14583e-20	2.29101e+07		Flex_rig_FtsZ	1.58844e-27			1.38065e-23	4.07291e-21
			Youngs_FtsZ	5.1775e+07
	22.9101		Youngs_FtsZ	51.8			effective r	r	2.5
	(Mpa)			(Mpa)			Inertia_area	I	3.06796e-35
		E_z/E_l	2.26101

## Sheet: Fig 5. Ring-diameters
FtsZ	T108A	(um)
0.45	0.98
0.53	0.92
0.45	1.19
0.35	0.76
0.4	0.65
0.45	0.81
0.53	1.31
0.4	0.91
0.47	0.64
0.56	0.91
0.64	0.94
0.64	0.86
0.5	1.06
0.4	0.69
0.43	0.98
0.45	0.98
0.4	0.72
0.5	1.15
0.4	0.8
0.32	0.91
0.45	0.7
0.35	0.95
0.4	1.5
0.3	0.69
0.5	0.91
0.4	1
0.45	1
0.53	0.91
0.49	0.61
0.4	0.82
0.36	0.91
0.49	1
0.32	0.69
0.45	0.95
0.4	1.36
0.32	0.86
0.4	0.91
0.36	0.78
0.32	0.82
0.49	1.1
0.45	0.61
0.4	1
0.6	0.91
0.53	0.69
0.36	1.3
0.6	1.1
0.4	0.6
0.32	0.8
0.28	0.74
0.4	0.84
0.45	0.44
0.49	0.91
0.45	0.86
0.4	1
0.4	1
0.36	1
0.49	1
0.5	1
0.36	0.78
0.36	1.33
0.45	0.5
0.5	0.75
0.49	0.64
0.45	1
0.36	0.5
0.36	0.64
0.45	1
0.53	0.7
0.45	0.7
0.45	1.1
0.36	0.9
0.4	0.7
0.49	0.8
0.57	1.11
0.4	0.81
0.36	0.73
0.4	0.9
0.53	0.91
0.53	0.95
0.4	0.77
0.4	0.81
0.49	0.78
0.4	0.91
0.45	0.81
0.4	0.81
0.45	0.91
0.6	0.91
0.4	0.86
0.36	1
0.4	0.82
0.53	1
0.79	0.9
0.53	1.28
0.45	0.81
0.49	0.81
0.49	1.15
0.53	1.15
0.4	0.86
0.45	0.9
0.49	1
0.57	1
	1.11
	0.81
	0.81
	0.65
	1.15
	0.81
	0.86
	0.91
	1
	0.71
	1

## Sheet: Fig 2S. Tube-diameters
Diameter	(um)
0.504
0.493
0.403
0.54
0.391
0.481
0.491
0.473
0.519
0.468
0.503
0.433
0.42
0.498
0.464
0.393
0.555
0.527
0.427
0.414
0.374
0.52
0.387
0.58
0.434
0.554
0.4915
0.442
0.523
0.487
0.481
0.422
0.506
0.436
0.506
0.42
0.437
0.515
0.5683
0.512
0.619
0.454
0.44
0.518
0.522
0.475
0.403
0.438
0.375
0.446
0.454
0.402
0.469
0.419
0.477

## Sheet: Fig 5. Necks
FtsZ-YFP-mts					T108A
Vesicle	Deformations	Necks			Vesicles	Def	Necks
1	1	1	S1		7	7	1	S1
4	4	3	S2		2	2	1	S2
2	2	1	S3		6	6	2	S3
4	4	3	S4			15	4
10	10	9	S5				0.266667
5	5	4	S6				3.02885
Total	26	21
		0.807692

## Sheet: Fig 6. Vesiculation
		spheric		irregular surface		vesiculation		single vesicle		multiple vesicles			total
		%	n	%	n	%		%	n	%	n		%	n
	E. coli ftsZ-yfp-MTS glass	12	6	22	11	66	33	14	7	52	26		100	50
	E. coli DH5α glass	48.8	21	39.5	17	11.6279	5	9.30233	4	2.32558	1		99.9279	43
